# Supplementary material for: Marine diversity in the biosphere reserve of the most oceanic island in the Gulf of California: San Pedro Mártir
Source: Zookeys. 2021 Oct 15;1062:177–201. doi: 10.3897/zookeys.1062.67964 (PMC8536610; doi:10.3897/zookeys.1062.67964)
Supplement: Supplementary material 1 — Table S1 [file zookeys-1062-177-s001.xlsx]

## Sheet: Hoja1
Table S.1. Differences between the buffer zone and core zones regarding four ecological indicator. p < 0.001 values are considered as statistically different
Invertebrates	S’	p-Value	H’	p-Value	J’	p-Value
2007 Core zone	5.67 (1.80)		1.30 (0.30)		0.78 (0.15)
2007 Buffer zone	6.87 (2.03)		1.42 (0.25)		0.76 (0.06)
2008 Buffer zone	6.50 (1.96)		1.37 (0.31)		0.75 (0.13)
2008 Core zone	6.56 (1.81)		1.40 (0.36)		0.77 (0.12)
2009 Buffer zone	5.33 (1.49)		1.18 (0.38)		0.73 (0.16)
2009 Core zone	5.10 (1.68)		1.08 (0.41)		0.69 (0.18)
2010 Buffer zone	5.33 (2.01)		1.07 (0.49)		0.67 (0.21)
2010 Core zone	5.83 (1.48)		1.15 (0.33)		0.66 (0.15)
2011 Buffer zone	5.38 (1.81)		1.09 (0.46)		0.67 (0.22)
2011 Core zone	5.45 (1.52)		1.01 (0.32)		0.61 (0.18)
2012 Buffer zone	3.79 (1.49)		0.90 (0.43)		0.73 (0.20)
2012 Core zone	4.25 (1.27)		1.03 (0.24)		0.75 (0.15)
2013 Buffer zone	5.22 (1.15)		0.92 (0.42)		0.57 (0.25)
2013 Core zone	5.64 (1.40)		0.98 (0.36)		0.58 (0.21)
2014 Buffer zone	3.98 (2.04)		0.95 (0.57)		0.78 (0.16)
2014 Core zone	4.78 (1.77)		1.02 (0.40)		0.68 (0.23)
2015 Buffer zone	4.19 (1.58)		0.93 (0.36)		0.70 (0.22)
2015 Core zone	3.59 (1.58)		0.69 (0.39)		0.60 (0.26)
2016 Buffer zone	4.69 (1.65)		0.93 (0.42)		0.65 (0.20)
2016 Core zone	4.86 (1.10)		1.18 (0.24)		0.76 (0.10)
2017 Buffer zone	3.69 (1.74)		0.91 (0.47)		0.77 (0.13)
2017 Core zone	3.29 (1.41)		0.77 (0.39)		0.72 (0.21)
Fishes	S’	p-Value	H’	p-Value	J’	p-Value
2007 Core zone	8.64 (2.78)		1.10 (0.42)		0.52 (0.17)
2007Buffer zone	7.65 (2.56)		0.96 (0.39)		0.49 (0.16)
2008 Buffer zone	8.46 (2.27)		1.03 (0.50)		0.49 (0.22)
2008 Core zone	9.10 (3.27)		1.22 (0.50)		0.58 (0.21)
2009 Buffer zone	8.82 (2.15)		1.18 (0.41)		0.56 (0.20)
2009 Core zone	8.15 (2.61)		1.29 (0.40)		0.63 (0.16)
2010 Buffer zone	8.96 (2.01)		1.43 (0.34)		0.66 (0.14)
2010 Core zone	9.14 (2.17)		1.45 (0.34)		0.67 (0.14)
2011 Buffer zone	7.99 (2.44)		1.59 (0.28)		0.79 (0.10)
2011 Core zone	8.43 (2.30)		1.50 (0.34)		0.72 (0.15)
2012 Buffer zone	8.24 (2.30)		1.45 (0.30)		0.70 (0.12)
2012 Core zone	7.40 (2.579		1.29 (0.35)		0.68 (0.16)
2013 Buffer zone	7.57 (1.67)		1.14 (0.33)		0.57 (0.17)
2013 Core zone	7.47 (1.78)		1.28 (0.34)		0.64 (0.14)
2014 Buffer zone	7.94 (1.85)		1.38 (0.33)		0.68 (0.16)
2014 Core zone	8.03 (2.14)		1.46 (0.29)		0.72 (0.14)
2015 Buffer zone	8.65 (2.05)		1.35 (0.34)		0.64 (0.14)
2015 Core zone	8.45 (2.45)		1.35 (0.34)		0.65 (0.13)
2016 Buffer zone	8.39 (2.05)	*	1.50 (0.35)		0.72 (0.15)	*
2016 Core zone	6.58 (2.78)		1.43 (0.45)		0.81 (0.12)
2017 Buffer zone	6.56 (1.79)		1.45 (0.28)		0.79 (0.11)
2017 Core zone	6.32 (2.41)		1.33 (0.35)		0.75 (0.13)
